# Supplementary material for: Alterations in Fecal Microbiota Linked to Environment and Sex in Red Deer (Cervus elaphus)
Source: MDPI journal article supplement (doi:10.3390/ani13050929), 2023-03-04
Supplement: s1 [file s1]

**Table S5 The results of PERMANOVA analysis based on weighted UniFrac and Unweighted UniFrac**

**weighted UniFrac**

| Group1 | Group2 | Sample#size | Permutations | pseudo#F  | p#value | q#value |
|--------|--------|-------------|--------------|-----------|---------|---------|
| all    | -      | 33          | 999          | 13.818965 | 0.001   | -       |
| WF     | WM     | 22          | 999          | 0.79107   | 0.547   | 0.547   |
| WF     | CF     | 18          | 999          | 21.734279 | 0.001   | 0.003   |
| WF     | CM     | 13          | 999          | 14.602901 | 0.005   | 0.0075  |
| WM     | CF     | 20          | 999          | 24.696271 | 0.001   | 0.003   |
| WM     | CM     | 15          | 999          | 16.786507 | 0.003   | 0.006   |
| CF     | CM     | 11          | 999          | 1.259629  | 0.203   | 0.2436  |

**Unweighted UniFrac**

| Group1 | Group2 | Sample#size | Permutations | pseudo#F | p#value | q#value |
|--------|--------|-------------|--------------|----------|---------|---------|
| all    | -      | 33          | 999          | 5.983939 | 0.001   | -       |
| WF     | WM     | 22          | 999          | 0.880224 | 0.756   | 0.756   |
| WF     | CF     | 18          | 999          | 9.363555 | 0.001   | 0.003   |
| WF     | CM     | 13          | 999          | 7.416048 | 0.004   | 0.006   |
| WM     | CF     | 20          | 999          | 9.362129 | 0.001   | 0.003   |
| WM     | CM     | 15          | 999          | 6.704129 | 0.003   | 0.006   |
| CF     | CM     | 11          | 999          | 1.38619  | 0.073   | 0.0876  |
