# Supplementary material for: Alterations in Fecal Microbiota Linked to Environment and Sex in Red Deer (Cervus elaphus)
Source: MDPI journal article supplement (doi:10.3390/ani13050929), 2023-03-04
Supplement: s1 [file s1]

**Table S4** Nutritional content of the main food of captive red deer per 100 grams.

| Species              | Protein(%) | fiber(%) | Carbohydrate(%) | Fat(%) |
|----------------------|------------|----------|-----------------|--------|
| Corn                 | 7          | 4.4      | 66              | 2.7    |
| Soya bean            | 31         | 13.1     | 15              | 10.3   |
| wheat bran           | 13         | 20       | 55              | 3      |
| Elm leaves           | 5.2        | 7.5      | 37              | 4      |
| Mongolian oak leaves | 11.2       | 8.3      | 40              | 5.6    |
