# Supplementary material for: Alterations in Fecal Microbiota Linked to Environment and Sex in Red Deer (Cervus elaphus)
Source: MDPI journal article supplement (doi:10.3390/ani13050929), 2023-03-04
Supplement: s1 [file s1]

**Table S2** Individual information of 33 red deer

| Number | Sample Number | Sex    | location                                                      | Diet                                                                                                                                                                                                                                                                                                                                                                                     | Study sites                                                                                   | sampling time                                                     |                                                                                               |           |
|--------|---------------|--------|---------------------------------------------------------------|------------------------------------------------------------------------------------------------------------------------------------------------------------------------------------------------------------------------------------------------------------------------------------------------------------------------------------------------------------------------------------------|-----------------------------------------------------------------------------------------------|-------------------------------------------------------------------|-----------------------------------------------------------------------------------------------|-----------|
| 1      | WF1           | female | Gaogestai National Nature Reserve in Chifeng, Inner Mongolia, | <i>Ulmus pumila</i> , <i>Salix spp.</i> , <i>Tripolium vulgare</i> , <i>Armeniaca sibirica</i> , <i>Betula platyphylla</i> , <i>Spiraea salicifolia</i> , <i>Larix gmelinii</i> , <i>Lonicera chrysantha</i> , <i>Rosa davurica</i> , <i>Polygonum divaricatum</i> , <i>Ostryopsis davidiana</i> , <i>Rhododendron dauricum</i> , <i>Lespedeza bicolor</i> , <i>Caragana microphylla</i> | The Gaogestai Reserve in Chifeng, Inner Mongolia.                                             | 2019.3.9                                                          |                                                                                               |           |
| 2      | WF2           | female |                                                               |                                                                                                                                                                                                                                                                                                                                                                                          |                                                                                               | 2019.3.8                                                          |                                                                                               |           |
| 3      | WF3           | female |                                                               |                                                                                                                                                                                                                                                                                                                                                                                          |                                                                                               | 2019.3.13                                                         |                                                                                               |           |
| 4      | WF4           | female |                                                               |                                                                                                                                                                                                                                                                                                                                                                                          |                                                                                               | 2019.3.11                                                         |                                                                                               |           |
| 5      | WF5           | female |                                                               |                                                                                                                                                                                                                                                                                                                                                                                          |                                                                                               | 2019.3.10                                                         |                                                                                               |           |
| 6      | WF6           | female |                                                               |                                                                                                                                                                                                                                                                                                                                                                                          |                                                                                               | 2018.12.17                                                        |                                                                                               |           |
| 7      | WF7           | female |                                                               |                                                                                                                                                                                                                                                                                                                                                                                          |                                                                                               | 2018.12.22                                                        |                                                                                               |           |
| 8      | WF8           | female |                                                               |                                                                                                                                                                                                                                                                                                                                                                                          |                                                                                               | 2018.12.22                                                        |                                                                                               |           |
| 9      | WF9           | female |                                                               |                                                                                                                                                                                                                                                                                                                                                                                          |                                                                                               | 2018.12.19                                                        |                                                                                               |           |
| 10     | WF10          | female |                                                               |                                                                                                                                                                                                                                                                                                                                                                                          |                                                                                               | 2018.12.19                                                        |                                                                                               |           |
| 11     | WM1           | male   |                                                               | Hanshan Forest Farm in Chifeng, Inner Mongolia,                                                                                                                                                                                                                                                                                                                                          |                                                                                               | Corn , Soya bean , wheat bran , Elm leaves , Mongolian oak leaves | The Han Mountain Farm in Chifeng City, Inner Mongolia (adjacent to Gaogestai Nature Reserve). | 2019.3.8  |
| 12     | WM2           | male   |                                                               |                                                                                                                                                                                                                                                                                                                                                                                          |                                                                                               |                                                                   |                                                                                               | 2019.3.11 |
| 13     | WM3           | male   | 2019.3.9                                                      |                                                                                                                                                                                                                                                                                                                                                                                          |                                                                                               |                                                                   |                                                                                               |           |
| 14     | WM4           | male   | 2019.3.13                                                     |                                                                                                                                                                                                                                                                                                                                                                                          |                                                                                               |                                                                   |                                                                                               |           |
| 15     | WM5           | male   | 2019.3.10                                                     |                                                                                                                                                                                                                                                                                                                                                                                          |                                                                                               |                                                                   |                                                                                               |           |
| 16     | WM6           | male   | 2019.3.13                                                     |                                                                                                                                                                                                                                                                                                                                                                                          |                                                                                               |                                                                   |                                                                                               |           |
| 17     | WM7           | male   | 2018.12.22                                                    |                                                                                                                                                                                                                                                                                                                                                                                          |                                                                                               |                                                                   |                                                                                               |           |
| 18     | WM8           | male   | 2018.12.22                                                    |                                                                                                                                                                                                                                                                                                                                                                                          |                                                                                               |                                                                   |                                                                                               |           |
| 19     | WM9           | male   | 2018.12.18                                                    |                                                                                                                                                                                                                                                                                                                                                                                          |                                                                                               |                                                                   |                                                                                               |           |
| 20     | WM10          | male   | 2018.12.19                                                    |                                                                                                                                                                                                                                                                                                                                                                                          |                                                                                               |                                                                   |                                                                                               |           |
| 21     | WM11          | male   | 2018.12.18                                                    |                                                                                                                                                                                                                                                                                                                                                                                          |                                                                                               |                                                                   |                                                                                               |           |
| 22     | WM12          | male   | 2018.12.20                                                    |                                                                                                                                                                                                                                                                                                                                                                                          |                                                                                               |                                                                   |                                                                                               |           |
| 23     | CF1           | female | Hanshan Forest Farm in Chifeng, Inner Mongolia,               | Corn , Soya bean , wheat bran , Elm leaves , Mongolian oak leaves                                                                                                                                                                                                                                                                                                                        | The Han Mountain Farm in Chifeng City, Inner Mongolia (adjacent to Gaogestai Nature Reserve). | 2019.12.10                                                        |                                                                                               |           |
| 24     | CF2           | female |                                                               |                                                                                                                                                                                                                                                                                                                                                                                          |                                                                                               |                                                                   |                                                                                               |           |
| 25     | CF3           | female |                                                               |                                                                                                                                                                                                                                                                                                                                                                                          |                                                                                               |                                                                   |                                                                                               |           |
| 26     | CF4           | female |                                                               |                                                                                                                                                                                                                                                                                                                                                                                          |                                                                                               |                                                                   |                                                                                               |           |
| 27     | CF5           | female |                                                               |                                                                                                                                                                                                                                                                                                                                                                                          |                                                                                               |                                                                   |                                                                                               |           |
| 28     | CF6           | female |                                                               |                                                                                                                                                                                                                                                                                                                                                                                          |                                                                                               |                                                                   |                                                                                               |           |
| 29     | CF7           | female |                                                               |                                                                                                                                                                                                                                                                                                                                                                                          |                                                                                               |                                                                   |                                                                                               |           |
| 30     | CF8           | female |                                                               |                                                                                                                                                                                                                                                                                                                                                                                          |                                                                                               |                                                                   |                                                                                               |           |
| 31     | CM1           | male   |                                                               |                                                                                                                                                                                                                                                                                                                                                                                          |                                                                                               |                                                                   |                                                                                               |           |
| 32     | CM2           | male   |                                                               |                                                                                                                                                                                                                                                                                                                                                                                          |                                                                                               |                                                                   |                                                                                               |           |
| 33     | CM3           | male   |                                                               |                                                                                                                                                                                                                                                                                                                                                                                          |                                                                                               |                                                                   |                                                                                               |           |
