# Supplementary material for: Alterations in Fecal Microbiota Linked to Environment and Sex in Red Deer (Cervus elaphus)
Source: MDPI journal article supplement (doi:10.3390/ani13050929), 2023-03-04
Supplement: s1 [file s1]

**Table S3** The ratio and nutritional content of plants eaten by wild red deer of the Gaogestai Reserve in winter.

| Plant species                | Crude protein(%) | Energy content(J/g) | Fiber (%) |
|------------------------------|------------------|---------------------|-----------|
| <i>Ulmus pumila</i>          | 3.4              | 15498.06            | 66.54     |
| <i>Salix spp.</i>            | 5.41             | 20038.91            | 60.49     |
| <i>Tripolium vulgare</i>     | 4.27             | 18720.83            | 63.95     |
| <i>Armeniaca sibirica</i>    | 3.76             | 16721.71            | 57.05     |
| <i>Betula platyphylla</i>    | 5.28             | 21833.83            | 62.67     |
| <i>Spiraea salicifolia</i>   | 4.18             | 22698.18            | 58.85     |
| <i>Larix gmelinii</i>        | 1.26             | 16629.28            | 50.32     |
| <i>Lonicera chrysantha</i>   | 5.37             | 18810.99            | 51.44     |
| <i>Rosa davurica</i>         | 3.59             | 16201.82            | 58.54     |
| <i>Polygonum divaricatum</i> | 3.51             | 19038.82            | 66.34     |
| <i>Ostryopsis davidiana</i>  | 3.54             | 17630.33            | 44.54     |
| <i>Rhododendron dauricum</i> | 3.11             | 17343.23            | 62.21     |
| <i>Lespedeza bicolor</i>     | 5.29             | 12029.88            | 68.86     |
| <i>Caragana microphylla</i>  | 4.25             | 17320.63            | 58.42     |
