# Supplementary material for: Alterations in Fecal Microbiota Linked to Environment and Sex in Red Deer (Cervus elaphus)
Source: MDPI journal article supplement (doi:10.3390/ani13050929), 2023-03-04
Supplement: s1 [file s1]

**Table S1 The amplification system of PCR based on 16S rRNA gene.**

| Composition                     | Volum (μL) |
|---------------------------------|------------|
| Q5 high-fidelity DNA polymerase | 0.25       |
| 5*Reaction Buffer               | 5          |
| 5* High GC Buffer               | 5          |
| dNTP (10mM)                     | 2          |
| Template DNA                    | 2          |
| Forward primers (10uM)          | 1          |
| Reverse primers (10uM)          | 1          |
| water                           | 8.75       |

**Procedure:**

|      |       |             |
|------|-------|-------------|
| 98°C | 5min  |             |
| 98°C | 30 s  | } 25 cycles |
| 53°C | 30 s  |             |
| 72°C | 45 s  |             |
| 72°C | 5 min |             |
| 12°C | ∞     |             |
